# Supplementary material for: Design of synthetic oligoribonucleotide-based agonists of Toll-like receptor 3 and their immune response profiles in vitro and in vivo
Source: Royal Society of Chemistry journal article supplement (doi:10.1039/c2ob26946e), 2012-12-11
Supplement: c2ob26946e.pdf [file c2ob26946e.pdf]

## Supplementary Information

### **Design of synthetic oligoribonucleotide-based agonists of Toll-like receptor 3 and their immune response profiles *in vitro* and *in vivo***

Tao Lan, Daqing Wang, Lakshmi Bhagat, Victoria J. Philbin, Dong Yu, Jimmy X. Tang, Mallikarjuna R. Putta, Tim Sullivan, Nicola La Monica, Ekambar R. Kandimalla and Sudhir Agrawal\*

Idera Pharmaceuticals, Inc., 167 Sidney Street, Cambridge, MA 02139, USA.

#### Notes

\* *Idera Pharmaceuticals, Inc., 167 Sidney Street, Cambridge, MA 02139, USA. Fax: 617-679-5572; Tel: 617-679-5500; E-mail: [sagrawal@iderapharma.com](mailto:sagrawal@iderapharma.com)*

† Electronic Supporting Information (ESI) available

## Supplementary Information

**SI Table 1.** Sequences, analytical data and Tms of different lengths of dsORNs

| dsORN<br>Compound<br>Number | Sequence <sup>a</sup>                        | Length<br>of ORN<br>strands | Length of<br>alignment<br>& oligo I/C<br>segments <sup>b</sup> | Purity (%) <sup>c</sup> |     | MALDI-TOF<br>Mass <sup>d</sup> |       | Duplex<br>stability<br>Tm (°C) <sup>e</sup> | Hyper-<br>chromicity<br>(%) |
|-----------------------------|----------------------------------------------|-----------------------------|----------------------------------------------------------------|-------------------------|-----|--------------------------------|-------|---------------------------------------------|-----------------------------|
|                             |                                              |                             |                                                                | HPLC                    | CGE | Calc.                          | Found |                                             |                             |
|                             | 5'-GCAGUUGACA(C) <sub>30</sub> -3'           | 40-mer                      | 10-30                                                          | 95                      | 91  | 12340                          | 12328 | 57.9/48.6                                   | 27.0                        |
|                             | 5'-UGUCAACUGC(I) <sub>30</sub> -3'           | 40-mer                      | 10-30                                                          | 97                      | 90  | 13027                          | 13014 |                                             |                             |
|                             | 5'-CACUGGCAGUUGACA(C) <sub>35</sub> -3'      | 50-mer                      | 15-35                                                          | 96                      | 97  | 15456                          | 15468 | 71.9/50.8                                   | 26.9                        |
|                             | 5'-UGUCAACUGCCAGUG(I) <sub>35</sub> -3'      | 50-mer                      | 15-35                                                          | 98                      | 94  | 16309                          | 16307 |                                             |                             |
|                             | 5'-CACUGGCAGUUGACACAGGU(C) <sub>40</sub> -3' | 60-mer                      | 20-40                                                          | 96                      | 90  | 18613                          | 18633 | 77.3/51.2                                   | 22.7                        |
|                             | 5'-ACCUGUGUCAACUGCCAGUG(I) <sub>40</sub> -3' | 60-mer                      | 20-40                                                          | 95                      | 91  | 19551                          | 19562 |                                             |                             |

<sup>a</sup>: All ORNs are synthesized with phosphodiester backbone; <sup>b</sup>: first and second numbers indicate nucleotide length of alignment and oligo I/oligo C segments, respectively; <sup>c</sup>: purity is expressed as % full-length product with the rest being one or two nucleotides short as determined by anion-exchange HPLC and CGE (capillary gel electrophoresis); <sup>d</sup>: Mass was determined by MALDI-TOF mass spectral analysis, Calc. and Found indicate calculated and experimentally determined values, respectively; <sup>e</sup>: thermal melting stability of duplexes was determined by UV thermal denaturation curves at 1 μM concentration of duplex in 150 mM sodium chloride, 10 mM sodium hydrogen phosphate buffer, pH 7.2; data are representative of two independent experiments; the two Tm values correspond to duplex of alignment segments and duplex of oligo I/oligo C segments, respectively.

**SI Table 2.** Sequences, analytical data and Tms of 50-mer dsORNs with different lengths of alignment segments

| dsORN<br>Compound<br>Number | Sequence <sup>a</sup>                                                 | Length of<br>alignment<br>&oligo I/C<br>segments <sup>b</sup> | Purity (%) <sup>c</sup> |     | MALDI-TOF<br>Mass <sup>d</sup> |       | Duplex<br>stability<br>Tm (°C) <sup>e</sup> | Hyper-<br>chromicity<br>(%) |
|-----------------------------|-----------------------------------------------------------------------|---------------------------------------------------------------|-------------------------|-----|--------------------------------|-------|---------------------------------------------|-----------------------------|
|                             |                                                                       |                                                               | HPLC                    | CGE | Calc.                          | Found |                                             |                             |
| <b>1</b>                    | 5'-(C) <sub>50</sub> -3'                                              | 0-50                                                          | 97                      | 93  | 15197                          | 15188 | -/54.1                                      | 18.4                        |
|                             | 5'-(I) <sub>50</sub> -3'                                              | 0-50                                                          | 96                      | 90  | 16448                          | 16461 |                                             |                             |
| <b>2</b>                    | 5'-CACUG(C) <sub>45</sub> -3'                                         | 5-45                                                          | 95                      | 92  | 15262                          | 15272 | 25.0/52.0                                   | 17.3                        |
|                             | 5'-CAGUG(I) <sub>45</sub> -3'                                         | 5-45                                                          | 95                      | 90  | 16428                          | 16432 |                                             |                             |
| <b>3</b>                    | 5'-CACUGGCAGU(C) <sub>40</sub> -3'                                    | 10-40                                                         | 95                      | 90  | 15367                          | 15368 | 51.0/51.0                                   | 18.1                        |
|                             | 5'-ACUGCCAGUG(I) <sub>40</sub> -3'                                    | 10-40                                                         | 98                      | 91  | 16368                          | 16358 |                                             |                             |
| <b>4</b>                    | 5'-CACUGGCAGUUGACA(C) <sub>35</sub> -3'                               | 15-35                                                         | 96                      | 97  | 15456                          | 15468 | 71.9/50.8                                   | 26.9                        |
|                             | 5'-UGUCAACUGCCAGUG(I) <sub>35</sub> -3'                               | 15-35                                                         | 98                      | 94  | 16309                          | 16307 |                                             |                             |
| <b>5</b>                    | 5'-CACUGAGACUGAUGCCA(C) <sub>33</sub> -3'                             | 17-33                                                         | 95                      | 90  | 15480                          | 15479 | 73.9/50.0                                   | 24.2                        |
|                             | 5'-UGGCAUCAGUCUCAGUG(I) <sub>33</sub> -3'                             | 17-33                                                         | 95                      | 92  | 16300                          | 16301 |                                             |                             |
| <b>6</b>                    | 5'-CACUGGCAGUUGACACAGGU(C) <sub>30</sub> -3'                          | 20-30                                                         | 95                      | 90  | 15561                          | 15567 | 78.6/50.1                                   | 19.4                        |
|                             | 5'-ACCUGUGUCAACUGCCAGUG(I) <sub>30</sub> -3'                          | 20-30                                                         | 97                      | 93  | 16249                          | 16252 |                                             |                             |
| <b>7</b>                    | 5'-CACUGGCAGUUGACACAGGUUCCUCACUUC(C) <sub>20</sub> -3'                | 30-20                                                         | 96                      | 93  | 15589                          | 15584 | 86.1/44.2                                   | 24.7                        |
|                             | 5'-GAAGUGAGGAACCUUGUGUCAACUGCCAGUG(I) <sub>20</sub> -3'               | 30-20                                                         | 96                      | 94  | 16296                          | 16301 |                                             |                             |
| <b>8</b>                    | 5'-CACUGGCAGUUGACACAGGUUCCUCACUUCACAAAUCGUU(C) <sub>10</sub> -3'      | 40-10                                                         | 96                      | 91  | 15728                          | 15732 | 84.6/24.0                                   | 29.9                        |
|                             | 5'-AACGAUUUGUGAAGUGAGGAACCUUGUGUCAACUGCCAGUG(I) <sub>10</sub> -3'     | 40-10                                                         | 98                      | 93  | 16201                          | 15199 |                                             |                             |
| <b>9</b>                    | 5'-CACUGGCAGUUGACACAGGUUCCUCACUUCACAAAUCGUUCAUCG(C) <sub>5</sub> -3'  | 45-5                                                          | 97                      | 92  | 15794                          | 15801 | 86.9/<10                                    | 31.2                        |
|                             | 5'-CGAUGAACGAUUUGUGAAGUGAGGAACCUUGUGUCAACUGCCAGUG(I) <sub>5</sub> -3' | 45-5                                                          | 95                      | 90  | 16182                          | 16187 |                                             |                             |
| <b>10</b>                   | 5'-CACUGGCAGUUGACACAGGUUCCUCACUUCACAAAUCGUUCAUCGUUCAC-3'              | 50-0                                                          | 95                      | 91  | 15820                          | 15827 | 85.0/-                                      | 29.0                        |
|                             | 5'-GUGAACGAUGAACGAUUUGUGAAGUGAGGAACCUUGUGUCAACUGCCAGUG-3'             | 50-0                                                          | 95                      | 91  | 16186                          | 16200 |                                             |                             |

<sup>a</sup>: All ORNs are synthesized with phosphodiester backbone; <sup>b</sup>: first and second numbers indicate nucleotide length of alignment and oligo I/oligo C segments, respectively; <sup>c</sup>: purity is expressed as % full-length product with the rest being one or two nucleotides short as determined by anion-exchange HPLC and CGE (capillary gel electrophoresis); <sup>d</sup>: mass was determined by MALDI-TOF mass spectral analysis, Calc. and Found indicate calculated and experimentally determined values, respectively; <sup>e</sup>: thermal melting stability of duplexes was determined by UV thermal denaturation curves at 1 μM concentration of duplex in 150 mM sodium chloride, 10 mM sodium hydrogen phosphate buffer, pH 7.2; data are representative of two independent experiments; the two Tm values correspond to duplex of alignment segments and duplex of oligo I/oligo C segments, respectively.

**SI Table 3.** Sequences, analytical data and Tms of 50-mer dsORNs with different sequence compositions of alignment segments and chemical modifications in oligo I/oligo C segments

| dsORN<br>Compound<br>Number | Sequence <sup>a</sup>                                                                                                | Length of<br>alignment<br>& oligo I/C<br>segments <sup>b</sup> | Purity (%) <sup>c</sup> |     | MALD-TOF<br>Mass <sup>d</sup> |       | Duplex<br>stability<br>Tm (°C) <sup>e</sup> | Hyper-<br>chromicity<br>(%) |
|-----------------------------|----------------------------------------------------------------------------------------------------------------------|----------------------------------------------------------------|-------------------------|-----|-------------------------------|-------|---------------------------------------------|-----------------------------|
|                             |                                                                                                                      |                                                                | HPLC                    | CGE | Calc.                         | Found |                                             |                             |
| <b>11</b>                   | 5'-CACUGAGACUGAUGC(C) <sub>35</sub> -3'                                                                              | 15-35                                                          | 96                      | 92  | 15456                         | 15457 | 69.0/52.0                                   | 26.1                        |
|                             | 5'-GCAUCAGUCUCAGUG(I) <sub>35</sub> -3'                                                                              | 15-35                                                          | 96                      | 93  | 16309                         | 16304 |                                             |                             |
| <b>12</b>                   | 5'-CAAGGCAAGCAUUCG(C) <sub>35</sub> -3'                                                                              | 15-35                                                          | 95                      | 91  | 15479                         | 15477 | 69.0/53.0                                   | 26.1                        |
|                             | 5'-CGAAUGCUUGCCUUG(I) <sub>35</sub> -3'                                                                              | 15-35                                                          | 95                      | 95  | 16286                         | 16278 |                                             |                             |
| <b>13</b>                   | 5'- <u>CAA</u> UGGCAC <u>UU</u> ACA(C) <sub>35</sub> -3'                                                             | 15-35                                                          | 94                      | 93  | 15448                         | 15430 | 32.0/52.0                                   | 21.0                        |
|                             | 5'-UGUCAACUGCCAGUG(I) <sub>35</sub> -3'                                                                              | 15-35                                                          | 98                      | 97  | 16309                         | 16307 |                                             |                             |
| <b>14</b>                   | 5'-CACUGGCAGUUGACA(C) <sub>35</sub>                                                                                  | 15-35                                                          | 96                      | 97  | 15456                         | 15468 | 71.0/56.3                                   | 19.0                        |
|                             | 5'-UGUCAACUGCCAGUG(I) <sub>10</sub> <u>G*</u> (I) <sub>9</sub> <u>G*</u> (I) <sub>9</sub> <u>G*</u> (I) <sub>4</sub> | 15-35                                                          | 98                      | 93  | 16351                         | 16362 |                                             |                             |
| <b>15</b>                   | 5'-CACUGGCAGUUGACA(C) <sub>4</sub> <u>C*</u> (C) <sub>9</sub> <u>C*</u> (C) <sub>9</sub> <u>C*</u> (C) <sub>10</sub> | 15-35                                                          | 93                      | 90  | 15498                         | 15488 | 70.2/51.1                                   | 21.8                        |
|                             | 5'-UGUCAACUGCCAGUG(I) <sub>35</sub>                                                                                  | 15-35                                                          | 98                      | 94  | 16307                         | 16307 |                                             |                             |

<sup>a</sup>: All ORNs are synthesized with phosphodiester backbone ; Underlined nucleotides indicate mismatches, **G\*** and **C\*** indicate 7-deazaguanosine and 5-methylcytosine, respectively; <sup>b</sup>: first and second numbers indicate nucleotide length of alignment and oligo I/oligo C segments, respectively; <sup>c</sup>: purity is expressed as % full-length product with the rest being one or two nucleotides short as determined by anion-exchange HPLC and CGE (capillary gel electrophoresis); <sup>d</sup>: mass was determined by MALDI-ToF mass spectral analysis, Calc. and Found indicate calculated and experimentally determined values, respectively; <sup>e</sup>: thermal melting stability of duplexes was determined by UV thermal denaturation curves at 1 μM concentration of duplex in 150 mM sodium chloride, 10 mM sodium hydrogen phosphate buffer, pH 7.2; data are representative of two independent experiments; the two Tm values correspond to duplex of alignment segments and duplex of oligo I/oligo C segments, respectively.

## SI Figure 1

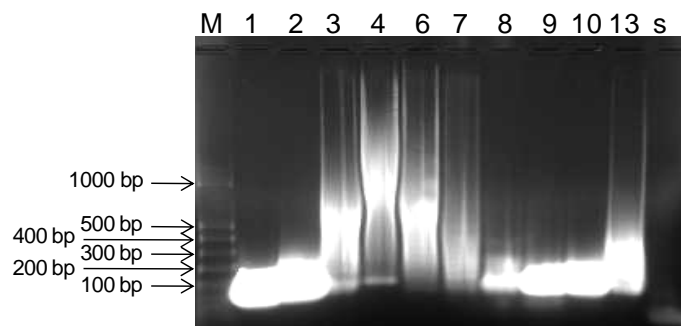

**SI Figure 1.** Agarose gel electrophoresis of dsORNs **1-4, 6-10** and **13**. Please see Table 1 for dsORN sequences. M stands for double-stranded RNA length markers. Numbers on the top of lanes correspond to dsORN numbers shown in Table 1. s Stands for oligo C strand of dsORN **4**.

Agarose gel (1%) containing 0.05% (v/v) ethidium bromide was loaded with about 1 OD of dsORNs and carried out electrophoresis using 1 X Tris borate EDTA buffer, pH 9.0 at a constant voltage of 90v for 3.5 hours in cold room. After the electrophoresis gel was placed on UV transilluminator and a photograph was taken.

## SI Figure 2

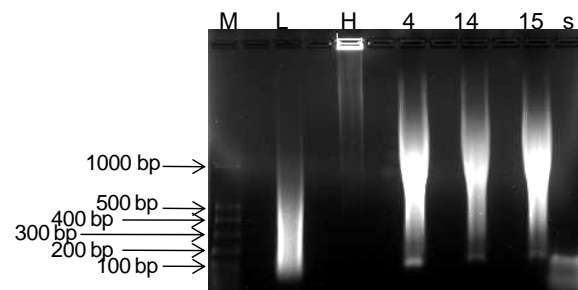

**SI Figure 2.** Agarose gel electrophoresis of dsORNs **4**, **14** and **15**. Please see Table 1 for dsORN sequences. M stands for double-stranded RNA length markers. Numbers on the top of lanes correspond to dsORN numbers in Table 1. L, H, and s stand for low molecular weight poly I:C (Invivogen), high molecular weight poly I:C (Invivogen) and oligo C strand of dsORN **4**. Agarose gel (1%) containing 0.05% (v/v) ethidium bromide was loaded with about 1 OD of dsORNs, low and high molecular weight poly I:C and carried out electrophoresis using 1 X Tris borate EDTA buffer, pH 9.0 at a constant voltage of 90v for 3.5 hours in cold room. After the electrophoresis gel was placed on UV transilluminator and a photograph was taken.

### SI Figure 3

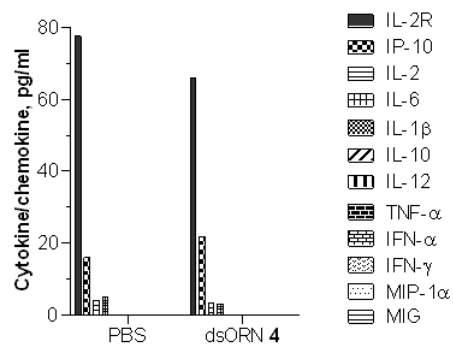

**SI Figure 3.** dsORN 4 does not induce cytokine responses in human pDCs. Human pDCs were cultured in the presence or absence of dsORN 4 at 500 µg/ml concentration for 24 hr. Cell culture supernatants were analyzed by multiplex assay. PBS was used as control. Data shown are representative of two independent experiments.

Human pDCs ( $10^6$ /ml) were plated into 96-well plates. dsORN 4 dissolved in PBS was added at 500 µg/ml concentration. The cells were then incubated at 37°C for 24 hours. The levels of cytokines and chemokines in the culture supernatants were measured using a human multiplex kit on the Applied Cytometry Systems Luminex 100/200 instruments, and the data were analyzed using StarStation software, version 2.0. The required reagents were purchased from Invitrogen (Carlsbad, CA).

### SI Figure 4

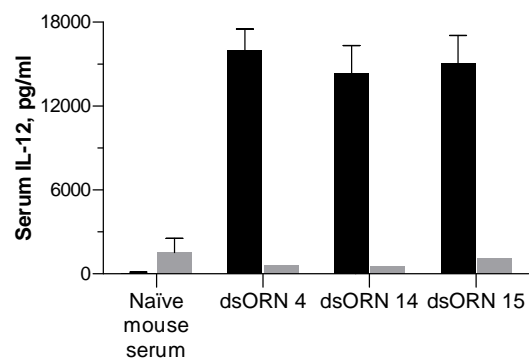

**SI Figure 4.** Serum IL-12 induction by dsORNs **4**, **14** and **15** in wild-type (black bars) and TLR3<sup>-/-</sup> (grey bars) C57BL/6 mice. dsORNs were administered subcutaneously at a dose of 10 mg/kg. Blood was collected 2 hr post dsORN administration and serum IL-12 levels were measured by ELISA. Naïve wild-type and knock-out mice serum was used as control. Data shown are mean of three mice  $\pm$  SD and are representative of two independent experiments.
